# Supplementary material for: Preclinical Intracranial Aneurysm Models: A Systematic Review
Source: PubMed Central journal article supplement (PMC7139747; doi:10.3390/brainsci10030134), 2020-02-27
Supplement: brainsci-10-00134-s001.pdf [file brainsci-10-00134-s001.pdf]

Supplementary Table 1 – Incidence of Aneurysm development

| <b>CCA ligation only</b>   | <b>Species</b>    | <b>Author Year</b>   | <b>Incidence</b>               |                  |    |
|----------------------------|-------------------|----------------------|--------------------------------|------------------|----|
| Unilateral                 | Mouse             | Abruzzo et al 2007   | 2/2 (100%)                     |                  |    |
|                            | Rat               | Alvarez 1986         | 2/10 (20%)                     |                  |    |
|                            |                   | Cai et al 2012       | 3/13 (23%)                     |                  |    |
|                            |                   | Coutard et al 2000   | LE 24% /F2 42% /BC 50%         |                  |    |
|                            |                   | Hahimoto et al. 1978 | 2/5(40%)                       |                  |    |
|                            |                   | Hashimoto 1979a      | 11/30 (37%)                    |                  |    |
|                            |                   | Hashimoto 1979b      | 10%                            |                  |    |
|                            |                   | Hashimoto 1980       | 21/67(31.34%)                  |                  |    |
|                            |                   | Ishibashi 2012       | 100%                           |                  |    |
|                            |                   | Kaufmann 2006        | 15/82 (18.3%)                  |                  |    |
|                            |                   | Matsushita 2012      | 6/20 (30%) / 16/20(80%)        |                  |    |
|                            |                   | Suzuki 1980          | 4/19(21%), 3/15(20%), 2/9(22%) |                  |    |
|                            |                   | Roda 1988            | 3/8 (37.5)                     |                  |    |
|                            |                   | Xu 2011a             | 100%                           |                  |    |
|                            |                   | Xu 2011b             | 100%                           |                  |    |
|                            |                   | Rabbit               | Dai et al 2013                 | 0%               |    |
|                            |                   |                      | Gao et al 2008                 | 88.75%           |    |
|                            |                   | Bilateral            | Rat                            | Tutino 2016      | na |
|                            |                   |                      | Rabbit                         | Dolan et al 2013 | na |
|                            | Kolega et al 2011 |                      |                                | 100%             |    |
| Li 2014                    | 100%              |                      |                                |                  |    |
| Liaw 2014                  | 100%              |                      |                                |                  |    |
| Mandelbaum 2013            | 100%              |                      |                                |                  |    |
| Metaxa 2010                | 100%              |                      |                                |                  |    |
| Tutino 2014                | 17-78%            |                      |                                |                  |    |
| Tutino 2015                | 17-78%            |                      |                                |                  |    |
| Primate                    | Tenjin 1995       |                      | 100%                           |                  |    |
| <b>CCA and RA ligation</b> |                   |                      |                                |                  |    |

|                |          |                |                                                                                  |
|----------------|----------|----------------|----------------------------------------------------------------------------------|
| Unilateral     | Mouse    | Aoki 2007      | 9/16 (56%) / 9/10(90%)                                                           |
|                |          | Aoki 2014      | 15/22 (68.18%)                                                                   |
|                |          | Morikawi 2006  | 6/11 (54.55%)                                                                    |
|                | Rat      | Aoki 2007      | 19/21 (90%)                                                                      |
|                |          | Aoki 2014      | 100%                                                                             |
|                |          |                | LE, 56%; Wistar, 33%; BN, 17%; LOU, 11%. Carotid ligation only, LE (86%) BN (7%) |
|                |          | Coutard 1997   | (7%)                                                                             |
|                |          | Fukuda 2014    | >80%                                                                             |
|                |          | Ikedo 2017     | na                                                                               |
|                |          | Miyata 2017    | na                                                                               |
|                | Primate  | Yamamoto 2017  | 90/92 (97.8%)                                                                    |
|                |          | Yamamoto 2017  | -                                                                                |
|                |          | Hashimoto 1987 | -                                                                                |
| Rabbit         | Gao 2008 | na             |                                                                                  |
| Bilateral      | Mouse    | Sadamasa 2003  | 10/16(62.5%) / 6/8 (74%)                                                         |
|                | Rat      | Alvarez 1986   | 6/9 (66.67%)                                                                     |
|                |          | Aoki 2007a     | 10/19(53%) / 19/21(91%)                                                          |
|                |          | Aoki 2007b     |                                                                                  |
|                |          | Aoki 2008a     |                                                                                  |
|                |          | Aoki 2008b     | 19/21 (90%)                                                                      |
|                |          | Aoki 2008c     |                                                                                  |
|                |          | Aoki 2008d     |                                                                                  |
|                |          | Aoki 2009      | na                                                                               |
|                |          | Aoki 2010a     |                                                                                  |
|                |          | Aoki 2010b     | na                                                                               |
|                |          | Aoki 2011      | 100%                                                                             |
|                |          | Aoki 2012      | na                                                                               |
|                |          | Aoki 2017a     |                                                                                  |
|                |          | Aoki 2017b     | na                                                                               |
| Eldawoody 2009 | 100%     |                |                                                                                  |

|                |                                      |
|----------------|--------------------------------------|
| Futami 1995a   | 23/31(74.2%) / 10/16 (62.5%) / 37.5% |
| Futami 1995b   |                                      |
| Futami 1998    | 14/29 (48.28%)                       |
| Guo 2016       | 30/71 (42.25%)                       |
| Hazama 1986    | 8/22 (36.36%)                        |
| Ishibashi 2010 | NA                                   |
| Jamous 2005a   |                                      |
| Jamous 2005b   | 60-100%                              |
| Jamous 2005c   |                                      |
| Jamous 2007    |                                      |
| Kang 1990      | 8/11 (72.75%)                        |
| Kim 1988       | 10/12 (83.3%)                        |
| Kim 1993       | na                                   |
| Kimura 2010    | 50%                                  |
| Kojima 1986    |                                      |
| Kondo 1997     |                                      |
| Kondo 1998     |                                      |
| Korai 2016     |                                      |
| Li 2014        | 100%                                 |
| Li 2015        |                                      |
| Maekawa 2017   |                                      |
| Miyamoto 2017  | 6/27(22%) / 15/26 (58%)              |
| Nagata 1979    |                                      |
| Nagata 1980    | 29-100%                              |
| Nagata 1981    |                                      |
| Nakatani 1993  | 15/20 (75%)                          |
| Sadamasa 2007  | 28/28(100%)                          |
| Sadamasa 2008  | 100%                                 |
| Tada 2010      | na                                   |
| Tamura 2009    | 50%                                  |

| Elastase injection |        |                 |                           |
|--------------------|--------|-----------------|---------------------------|
|                    |        | Yagi 2010       | 30%                       |
|                    |        | Yamazoe 1990    | 11/19 (57.89%)            |
|                    |        | Yokoi 2014      | na                        |
|                    |        | Wu 2016         | 27/30 (90%)               |
|                    |        | Zhou 1985       | na                        |
|                    | Mouse  | Cgalouhi 2016   | 100%                      |
|                    |        | Chu 2015        | 90%                       |
|                    |        | Hasan 2015      | >80%                      |
|                    |        | Kanematsu 2011  | 6/10 (60%) / 14/20 (70%)  |
|                    |        | Kuwabara 2017   | 82%                       |
|                    |        | Labeyrie 2017   | na                        |
|                    |        | Lee 2016        | 8/11 (72.75%)             |
|                    |        | Liu 2016        | >90%                      |
|                    |        | Makino 2012     | 7/10 (70%)                |
|                    |        | Makino 2015     | 6/10 (60%)                |
|                    |        | Nuki 2009       | 77%                       |
|                    |        | Pena Silva 2014 | 89%                       |
|                    |        | Pena Silva 2015 | 15/16 (94%) / 12/14 (86%) |
|                    |        | Shimada 2015a   |                           |
|                    |        | Shimada 2015b   | 88% / 19/23(82.3%)        |
|                    |        | Tada 2011       |                           |
|                    |        | Tada 2014a      |                           |
|                    |        | Tada 2014b      | 60-80%                    |
|                    |        | Tada 2014c      |                           |
|                    |        | Wada 2014       | 70-80%                    |
|                    |        | Zhang 2015      | na                        |
|                    | Rat    | Zhao 2015       | 41.70%                    |
|                    | Rabbit | Dai 2010        | 0%                        |
|                    |        | Yasuda 2005     | 100%                      |

**Elastase and CCA**

|       |              |      |
|-------|--------------|------|
| Mouse | Hoh 2014     | 89%  |
|       | Hoasaka 2014 | 100% |
|       | Hoasaka 2017 | na   |
|       | Nowicki 2017 | 75%  |

**Others**

|                                    |     |                |        |
|------------------------------------|-----|----------------|--------|
| Deoxycorticosterone/hypertension   | Rat | Lee 1978       | na     |
| Eplerenone                         | Rat | Tada 2009      | 59%    |
| Copper deficiency                  | Rat | Jung 2016      | 46.60% |
| CaCl <sub>2</sub>                  | Rat | Bo 2017        | na     |
| Coating of internal carotid artery | Dog | Ebina 1984     | na     |
| Venous pouch or venous patch       | Dog | Nishikawa 1977 | 55%    |

---
